# Supplementary material for: Machine learning approach informs biology of cancer drug response
Source: PubMed Central journal article supplement (PMC9112473; doi:10.1186/s12859-022-04720-z), 2022-05-17

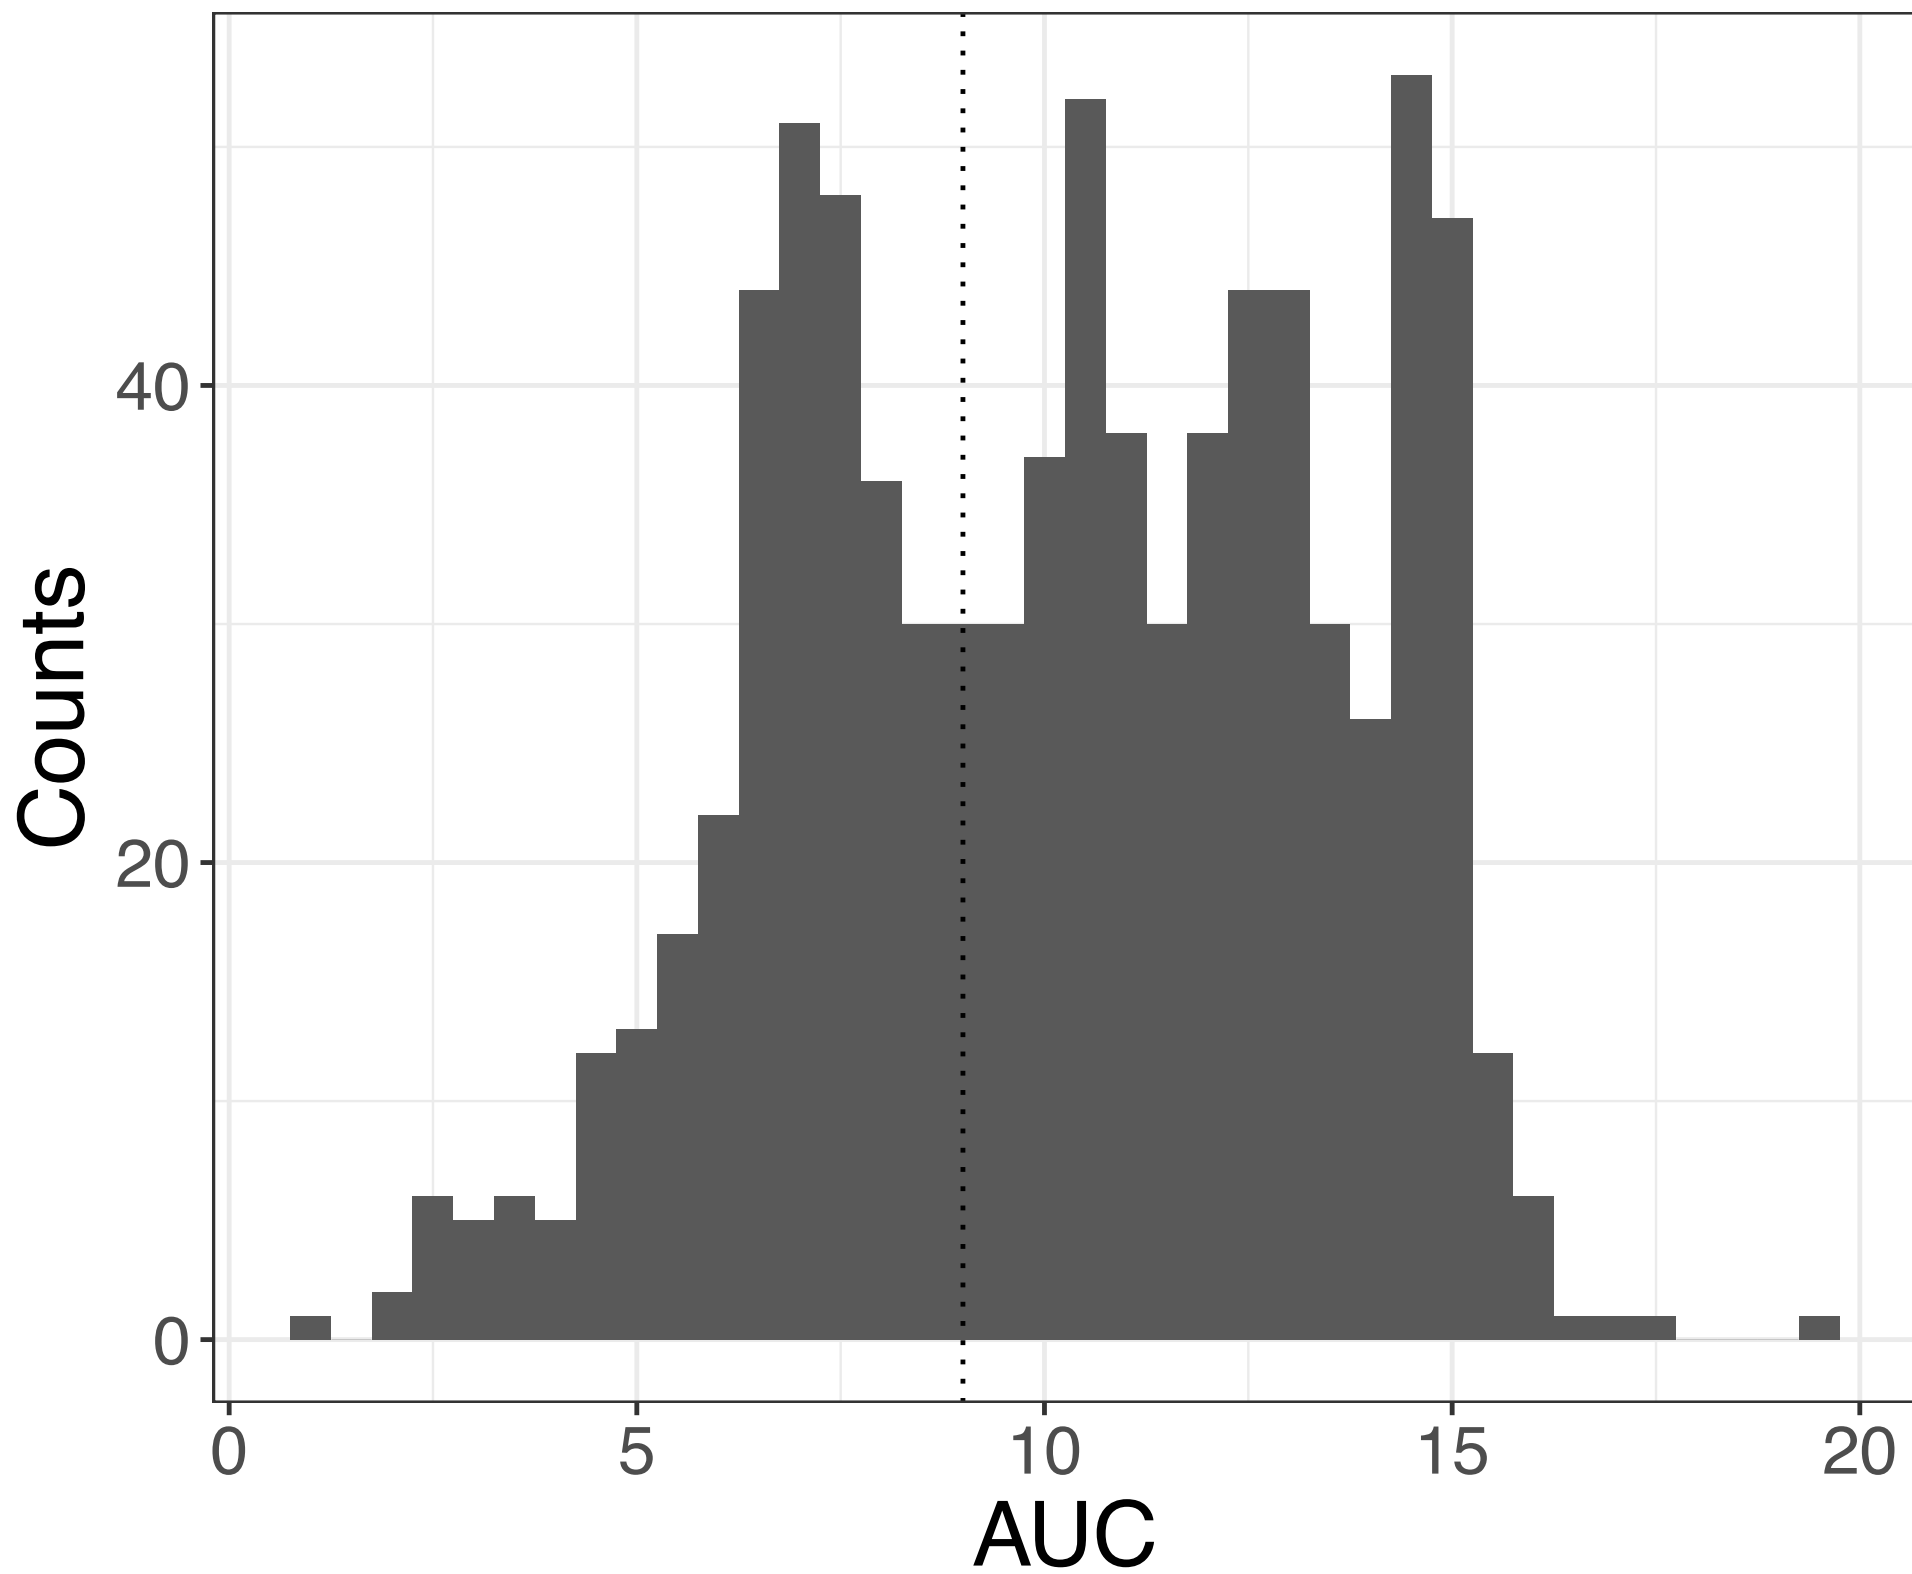

Supplement: 12859_2022_4720_MOESM1_ESM.pdf [file 12859_2022_4720_MOESM1_ESM.pdf]
